# Supplementary material for: Tecovirimat for Monkeypox in the Central African Republic under Expanded Access
Source: PubMed Central journal article supplement (PMC10117058; doi:10.1056/nejmc2210015), 2022-11-30
Supplement: NIHMS1856374-supplement-Supplement.pdf [file NIHMS1856374-supplement-Supplement.pdf]

## Supplementary appendix

### Contents

|                                                                                                                               |    |
|-------------------------------------------------------------------------------------------------------------------------------|----|
| Text S1 – Methods.....                                                                                                        | 2  |
| Table S2 – Case Report Form .....                                                                                             | 5  |
| Table S3 - Patients’ demographic information and characteristics at baseline, and post-baseline and outcomes .....            | 13 |
| Figure S4 – Number of days to no active lesions and average number of active lesions per day.....                             | 15 |
| Table S5 - Confirmed cases and case fatality ratio in CAR between 2010 and September 2022 – overall case fatality 10.4% ..... | 16 |

## **Text S1 – Methods**

The EAP is underway in Health Region 1, Lobaye district of CAR, located in the south-west of the country bordering the Republic of Congo and the Democratic Republic of the Congo. Mbaïki hospital – the district primary and referral health care facility with good access to the capital city Bangui – was selected as the main treatment centre at which tecovirimat would be administered for the EAP. Communication and travel within this highly rural, sparsely populated, and densely forested region is challenging, which has implications both for case finding and referral. While cases are reported also from other parts of CAR, the security situation in the country is such that the Lobaye district was the only practicable option.

A suspected case is defined as a subject presenting with clinical signs and symptoms indicative of monkeypox, such as fever and characteristic rash. We set in place an intensified active surveillance system: suspected cases are identified through referrals from community health workers, other health facilities and community leaders, and through contact tracing in villages of the district by the EAP team. Following the identification of a suspected case, blood and lesion samples are taken from the subject and blood samples are also taken from close contacts (regardless of the presence of clinical signs and symptoms) and transferred to the Institut Pasteur de Bangui reference laboratory for case confirmation. Eligible patients are those who received laboratory confirmation of monkeypox infection and weighed  $\geq 13$  kg. Patients receiving repaglinide are ineligible due to risk of interactions with tecovirimat.

Following consent, adult patients receive 600 mg of tecovirimat (3 x 200 mg capsules) twice daily for 14 days. Dosing for paediatric patients is based on weight: children weighing 13kg to <25kg receive 200 mg of tecovirimat (1 capsule) twice daily for 14 days; children weighing 25kg to <40 kg receive 400 mg of tecovirimat (2 capsules) twice daily for 14 days; and children weighing  $\geq 40$  kg receive 600 mg of tecovirimat (three capsules) of tecovirimat twice daily for 14 days. Patients are to stay in hospital for the duration of treatment, with follow-up visits planned on days 15 and 28.

Data on clinical signs and symptoms, including lesion burden, are recorded daily during treatment and at each follow-up visit.

Blood or lesions samples on pus or crusts are scheduled on days 1, 4, 8 and 14 during treatment, and then at day 28, to assess viral presence of MPXV using the G2R-G real-time PCR assay and the Congo Basin clade of the virus using the C3L real-time PCR assay. In this cohort, multiple samples were taken from some patients at some study visits. Patients with positive PCR on day 14 had an additional sample on day 21. Monkeypox disease is confirmed by detecting viral DNA on blood samples and/or lesion swabs.

As tecovirimat is administered via an EAP, outcome measures and endpoints were not predefined. Patient outcomes are monitored by evaluating the total number and location of lesions, temperature, degree of incapacity, presence of adverse events, patient survival, and virus DNA levels throughout treatment and follow-up.

Serious Adverse Events are monitored from consent until the patient's final study visit. Causality is assessed independently by the study clinician responsible for treating the patient and a medical monitor appointed by the Sponsor. If the study clinician and medical monitor return conflicting assessments, the causality assessment determining the strongest relationship to tecovirimat takes precedence. Suspected Unexpected Serious Adverse Reactions (SUSARs) are reported to the responsible ethics committees.

The EAP was approved by the Ministry of Health, Central African Republic, and obtained ethical clearance by the national ethics committee ("Comité Ethique et Scientifique, Université de Bangui Faculté des Sciences de la Santé") and Oxford Tropical Research Ethics Committee (OxTREC) at the University of Oxford.

The EAP is registered on the ISRCTN registry (reference: ISRCTN43307947).

### ***Statistical analysis***

A descriptive analysis of the demographics, signs and symptoms, and patient outcome of the enrolled patients who were treated with tecovirimat is presented. Signs and symptoms are reported as the number and proportion of patients for whom each sign or symptom was recorded at admission (baseline) and at any time post-baseline. A denominator is provided for each variable to indicate the number of patients for whom data were available.

Lesion presence is summarised as the number and proportion of patients for whom lesions are reported overall and by location at admission and any time post-baseline. At point of data collection, lesions were categorised as either active lesions, scabs or scars and are summarised here as either the presence of active lesions or the presence of lesions of any type. Lesion burden is summarised on a categorical scale: None; 1-5 lesions; 6-25 lesions; 26-100 lesions; >100 lesions. The median time to no active lesions is also reported.

The number and proportion of patients testing positive on PCR for MPXV, G2R-G and the Congo Basin clade, is reported for all study timepoints overall and per sample type tested (blood, active lesion and crust). The mean, standard deviation and range of reported CT values are also presented where more than one sample is available at any given timepoint.

A summary of serious adverse events (SAEs), including number of SAEs per patient and severity, is also provided.

The analysis was conducted by JB.

**Table S2 – Case Report Form**

| RECRUITMENT                                                                                   |                                                                                                                                  |
|-----------------------------------------------------------------------------------------------|----------------------------------------------------------------------------------------------------------------------------------|
| Patient ID number                                                                             | Site : [ ][ ] – Patient : [ ][ ][ ]                                                                                              |
| Date of hospitalisation for suspected monkeypox                                               | [_D_][_D_]/[_M_][_M_]/[_Y_][_Y_]                                                                                                 |
| Name of site at which the patient was identified                                              | <input type="checkbox"/> MBAIKI <input type="checkbox"/> LOKO <input type="checkbox"/> ZOUMEA <input type="checkbox"/> MONGOUMBA |
| ELIGIBILITY CRITERIA                                                                          |                                                                                                                                  |
| Weight ≥13 kg                                                                                 | <input type="checkbox"/> YES <input type="checkbox"/> NO                                                                         |
| Does the patient take repaglinide?                                                            | <input type="checkbox"/> YES <input type="checkbox"/> NO<br>If yes, the patient must be excluded from the study                  |
| Does the patient have confirmation by PCR of monkeypox infection?                             | <input type="checkbox"/> YES <input type="checkbox"/> NO<br>Date sample taken<br>[_D_][_D_]/[_M_][_M_]/[_Y_][_Y_]                |
| Has the patient (or their parent or representative) consented to be treated with tecovirimat? | <input type="checkbox"/> YES <input type="checkbox"/> NO                                                                         |
| Date of consent                                                                               | [_D_][_D_]/[_M_][_M_]/[_Y_][_Y_]                                                                                                 |
| Name of the person who consented the patient                                                  |                                                                                                                                  |

**1. DEMOGRAPHIC DATA**

|              |                                                               |
|--------------|---------------------------------------------------------------|
| Sex at birth | <input type="checkbox"/> Male <input type="checkbox"/> Female |
| Age          | [ ][ ] years OR [ ][ ] months                                 |
| Weight       | [ ][ ][ ] (kg)                                                |

**2. COMORBIDITIES**

|                       |                                                                                                |                                      |                                                                                                                                                                                                      |
|-----------------------|------------------------------------------------------------------------------------------------|--------------------------------------|------------------------------------------------------------------------------------------------------------------------------------------------------------------------------------------------------|
| Heart failure         | <input type="checkbox"/> YES <input type="checkbox"/> NO<br><input type="checkbox"/> Not known | Diuretics                            | <input type="checkbox"/> YES <input type="checkbox"/> NO<br><input type="checkbox"/> Not known                                                                                                       |
| COPD/ Asthma          | <input type="checkbox"/> YES <input type="checkbox"/> NO<br><input type="checkbox"/> Not known | Nasal steroids                       | <input type="checkbox"/> YES <input type="checkbox"/> NO<br><input type="checkbox"/> Not known                                                                                                       |
| Diabetes              | <input type="checkbox"/> YES <input type="checkbox"/> NO<br><input type="checkbox"/> Not known | Oral hypoglycaemic agents<br>Insulin | <input type="checkbox"/> YES <input type="checkbox"/> NO<br><input type="checkbox"/> Not known<br><br><input type="checkbox"/> YES <input type="checkbox"/> NO<br><input type="checkbox"/> Not known |
| Chronic renal failure | <input type="checkbox"/> YES <input type="checkbox"/> NO<br><input type="checkbox"/> Not known | Dialysis                             | <input type="checkbox"/> YES <input type="checkbox"/> NO<br><input type="checkbox"/> Not known                                                                                                       |
| HIV                   | <input type="checkbox"/> YES <input type="checkbox"/> NO<br><input type="checkbox"/> Not known | Antiretroviral treatment             | <input type="checkbox"/> YES <input type="checkbox"/> NO<br><input type="checkbox"/> Not known                                                                                                       |
| Malnutrition          | <input type="checkbox"/> YES <input type="checkbox"/> NO                                       |                                      |                                                                                                                                                                                                      |

|  |                                    |  |  |
|--|------------------------------------|--|--|
|  | <input type="checkbox"/> Not known |  |  |
|--|------------------------------------|--|--|

**3. SIGNS AND SYMPTOMS FORM (TO BE COMPLETED AT ADMISSION)**

|                                                                                            |                         |                                                                                                                                                     |                                                   |               |              |              |
|--------------------------------------------------------------------------------------------|-------------------------|-----------------------------------------------------------------------------------------------------------------------------------------------------|---------------------------------------------------|---------------|--------------|--------------|
| Date of evaluation : [_D][_D]/[_M][_M]/[_Y][_Y]                                            |                         |                                                                                                                                                     |                                                   |               |              |              |
| Date of symptom onset : [_D][_D]/[_M][_M]/[_Y][_Y]                                         |                         |                                                                                                                                                     |                                                   |               |              |              |
| Date of infection (if known) [_D][_D]/[_M][_M]/[_Y][_Y] Not known <input type="checkbox"/> |                         |                                                                                                                                                     |                                                   |               |              |              |
| <b>Fever</b>                                                                               |                         | <input type="checkbox"/> YES <input type="checkbox"/> NO <input type="checkbox"/> Not known Number of days [_D][_D]                                 |                                                   |               |              |              |
| <b>Skin rash (lesions)</b>                                                                 |                         | <input type="checkbox"/> YES <input type="checkbox"/> NO Number of days [_D][_D]                                                                    |                                                   |               |              |              |
| <b>Lesion characteristics</b>                                                              | Distribution of lesions | <b>Site</b>                                                                                                                                         | <b>Number of each type of lesion at each site</b> |               |              |              |
|                                                                                            |                         |                                                                                                                                                     | <b>New lesion</b>                                 | <b>Crusts</b> | <b>Scars</b> | <b>Other</b> |
|                                                                                            |                         | <input type="checkbox"/> Palms of hands                                                                                                             |                                                   |               |              |              |
|                                                                                            |                         | <input type="checkbox"/> Soles of feet                                                                                                              |                                                   |               |              |              |
|                                                                                            |                         | <input type="checkbox"/> Face                                                                                                                       |                                                   |               |              |              |
|                                                                                            |                         | <input type="checkbox"/> Back                                                                                                                       |                                                   |               |              |              |
|                                                                                            |                         | <input type="checkbox"/> Thighs                                                                                                                     |                                                   |               |              |              |
|                                                                                            |                         | <input type="checkbox"/> Legs                                                                                                                       |                                                   |               |              |              |
|                                                                                            |                         | <input type="checkbox"/> Arms                                                                                                                       |                                                   |               |              |              |
|                                                                                            |                         | <input type="checkbox"/> Forearms                                                                                                                   |                                                   |               |              |              |
|                                                                                            |                         | <input type="checkbox"/> Abdomen                                                                                                                    |                                                   |               |              |              |
|                                                                                            |                         | <input type="checkbox"/> Chest                                                                                                                      |                                                   |               |              |              |
|                                                                                            |                         | <input type="checkbox"/> Genitals                                                                                                                   |                                                   |               |              |              |
|                                                                                            |                         | <input type="checkbox"/> Mouth                                                                                                                      |                                                   |               |              |              |
|                                                                                            |                         | <input type="checkbox"/> Nose                                                                                                                       |                                                   |               |              |              |
| <input type="checkbox"/> Other, Specify : _____                                            |                         |                                                                                                                                                     |                                                   |               |              |              |
| <b>Pain at lesion site</b>                                                                 |                         | <input type="checkbox"/> YES <input type="checkbox"/> NO<br>If yes, pain score : [_][_]                                                             |                                                   |               |              |              |
| <b>Please describe any other lesion complications :</b>                                    |                         | _____<br>_____<br>_____<br>_____                                                                                                                    |                                                   |               |              |              |
| <b>Keratitis</b>                                                                           |                         | <input type="checkbox"/> YES <input type="checkbox"/> NO <input type="checkbox"/> Not known Number of days [_D][_D]                                 |                                                   |               |              |              |
| <b>Cough</b>                                                                               |                         | <input type="checkbox"/> YES <input type="checkbox"/> NO <input type="checkbox"/> Not known Number of days [_D][_D]                                 |                                                   |               |              |              |
| <b>Clear sputum :</b>                                                                      |                         | <input type="checkbox"/> YES <input type="checkbox"/> NO <input type="checkbox"/> Not known Number of days [_D][_D]                                 |                                                   |               |              |              |
| <b>Upper respiratory symptoms (sore throat, runny nose)</b>                                |                         | <input type="checkbox"/> YES <input type="checkbox"/> NO <input type="checkbox"/> Not known Number of days [_D][_D]<br>If yes, please specify _____ |                                                   |               |              |              |
| <b>Lower respiratory symptoms (productive cough, wheezing, respiratory distress)</b>       |                         | <input type="checkbox"/> YES <input type="checkbox"/> NO <input type="checkbox"/> Not known Number of days [_D][_D]<br>If yes, please specify _____ |                                                   |               |              |              |
| <b>Breathlessness</b>                                                                      |                         | <input type="checkbox"/> YES <input type="checkbox"/> NO <input type="checkbox"/> Not known Number of days [_D][_D]                                 |                                                   |               |              |              |

|                                |                                                                                                                                                                    |                                                          |                                                                                             |                                                                         |
|--------------------------------|--------------------------------------------------------------------------------------------------------------------------------------------------------------------|----------------------------------------------------------|---------------------------------------------------------------------------------------------|-------------------------------------------------------------------------|
| <b>Lymphadenopathy</b>         | <input type="checkbox"/> YES <input type="checkbox"/> NO <input type="checkbox"/> Not known                                                                        |                                                          |                                                                                             | Number of days [_D][_D_]                                                |
| <b>Site of lymphadenopathy</b> | Axillary                                                                                                                                                           | <input type="checkbox"/> YES <input type="checkbox"/> NO |                                                                                             | Left <input type="checkbox"/> Right <input type="checkbox"/>            |
|                                | Cervical                                                                                                                                                           | <input type="checkbox"/> YES <input type="checkbox"/> NO |                                                                                             | Left <input type="checkbox"/> Right <input type="checkbox"/>            |
|                                | Inguinal                                                                                                                                                           | <input type="checkbox"/> YES <input type="checkbox"/> NO |                                                                                             | Left <input type="checkbox"/> Right <input type="checkbox"/>            |
|                                | Other                                                                                                                                                              | <input type="checkbox"/> YES <input type="checkbox"/> NO |                                                                                             | Site _____ Left <input type="checkbox"/> Right <input type="checkbox"/> |
| <b>Vomiting</b>                | <input type="checkbox"/> YES <input type="checkbox"/> NO <input type="checkbox"/> Not known                                                                        |                                                          |                                                                                             | Number of days [_D][_D_]                                                |
| <b>Diarrhoea</b>               | <input type="checkbox"/> YES <input type="checkbox"/> NO <input type="checkbox"/> Not known                                                                        |                                                          |                                                                                             | Number of days [_D][_D_]                                                |
| <b>Headache</b>                | <input type="checkbox"/> YES <input type="checkbox"/> NO <input type="checkbox"/> Not known                                                                        |                                                          |                                                                                             | Number of days [_D][_D_]                                                |
| <b>Muscle pain</b>             | <input type="checkbox"/> YES <input type="checkbox"/> NO <input type="checkbox"/> Not known                                                                        |                                                          |                                                                                             | Number of days [_D][_D_]                                                |
| <b>Joint pain</b>              | <input type="checkbox"/> YES <input type="checkbox"/> NO <input type="checkbox"/> Not known                                                                        |                                                          |                                                                                             | Number of days [_D][_D_]                                                |
| <b>Seizure</b>                 | <input type="checkbox"/> YES <input type="checkbox"/> NO <input type="checkbox"/> Not known                                                                        |                                                          |                                                                                             | Number of days [_D][_D_]                                                |
| <b>Level of consciousness</b>  | <input type="checkbox"/> Alert <input type="checkbox"/> Confused <input type="checkbox"/> Vocal <input type="checkbox"/> Pain <input type="checkbox"/> Unconscious |                                                          |                                                                                             |                                                                         |
| <b>Level of capacity</b>       | <b>Patient is able to feed himself/herself</b>                                                                                                                     |                                                          | <input type="checkbox"/> YES <input type="checkbox"/> NO <input type="checkbox"/> Not known |                                                                         |
|                                | <b>Patient is able to drink</b>                                                                                                                                    |                                                          | <input type="checkbox"/> YES <input type="checkbox"/> NO <input type="checkbox"/> Not known |                                                                         |
|                                | <b>Patient is able to walk</b>                                                                                                                                     |                                                          | <input type="checkbox"/> YES <input type="checkbox"/> NO <input type="checkbox"/> Not known |                                                                         |
| <b>Vital signs</b>             |                                                                                                                                                                    |                                                          |                                                                                             |                                                                         |
| <b>Respiratory rate</b>        | [_][_]/min                                                                                                                                                         |                                                          |                                                                                             |                                                                         |
| <b>Pulse</b>                   | [_][_]/min                                                                                                                                                         |                                                          |                                                                                             |                                                                         |
| <b>Blood pressure</b>          | Systolic [_][_]/mmHg Diastolic [_][_]/mmHg                                                                                                                         |                                                          |                                                                                             |                                                                         |
| <b>Temperature</b>             | [_][_].[_] C                                                                                                                                                       |                                                          |                                                                                             |                                                                         |
| <b>Oxygen saturation</b>       | [_][_] % <input type="checkbox"/> Dans l'atmosphère <input type="checkbox"/> On oxygen treatment                                                                   |                                                          |                                                                                             |                                                                         |
|                                | [_][_] L/min                                                                                                                                                       |                                                          |                                                                                             |                                                                         |

#### 4. PRÉLÈVEMENT D'ÉCHANTILLONS POUR LE LABORATOIRE À L'ADMISSION

|                                       |                                                                                                |                                                                     |                                                                        |
|---------------------------------------|------------------------------------------------------------------------------------------------|---------------------------------------------------------------------|------------------------------------------------------------------------|
| <b>Blood</b>                          | <input type="checkbox"/> YES <input type="checkbox"/> NO Date<br>[_D][_D_]/[_M][_M_]/[_Y][_Y_] | PCR                                                                 | <input type="checkbox"/> Positive<br><input type="checkbox"/> Negative |
| <b>Lesion swab</b>                    | <input type="checkbox"/> YES <input type="checkbox"/> NO Date<br>[_D][_D_]/[_M][_M_]/[_Y][_Y_] | PCR                                                                 | <input type="checkbox"/> Positive<br><input type="checkbox"/> Negative |
| <b>Malaria RDT</b>                    | <input type="checkbox"/> YES <input type="checkbox"/> NO Date<br>[_D][_D_]/[_M][_M_]/[_Y][_Y_] | <input type="checkbox"/> Positive <input type="checkbox"/> Negative |                                                                        |
| <b>HIV RDT</b>                        | <input type="checkbox"/> YES <input type="checkbox"/> NO Date<br>[_D][_D_]/[_M][_M_]/[_Y][_Y_] | <input type="checkbox"/> Positive <input type="checkbox"/> Negative |                                                                        |
| <b>HIV test (confirmation at IPB)</b> | <input type="checkbox"/> YES <input type="checkbox"/> NO Date<br>[_D][_D_]/[_M][_M_]/[_Y][_Y_] | <input type="checkbox"/> Positive <input type="checkbox"/> Negative |                                                                        |



|                                                              |                                                                                              |                                                                                                  |
|--------------------------------------------------------------|----------------------------------------------------------------------------------------------|--------------------------------------------------------------------------------------------------|
| Female patients of childbearing potential:<br>Pregnancy test | <input type="checkbox"/> YES <input type="checkbox"/> NO Date<br>[ ] [ ] / [ ] [ ] / [ ] [ ] | <input type="checkbox"/> Positive <input type="checkbox"/> Negative<br>Si positive [ ] [ ] weeks |
|                                                              |                                                                                              |                                                                                                  |

**5. SIGNS AND SYMPTOMS FORM (EVERY DAY OF TREATMENT, D15, D21 (IF APPLICABLE) AND D28)**

|                                                                                      |                                                                                                                             |                                         |                                                   |               |              |              |
|--------------------------------------------------------------------------------------|-----------------------------------------------------------------------------------------------------------------------------|-----------------------------------------|---------------------------------------------------|---------------|--------------|--------------|
| Date of evaluation : [ ] [ ] / [ ] [ ] / [ ] [ ]                                     |                                                                                                                             |                                         |                                                   |               |              |              |
| <b>Fever</b>                                                                         | <input type="checkbox"/> YES <input type="checkbox"/> NO <input type="checkbox"/> Not known                                 |                                         |                                                   |               |              |              |
| <b>Skin rash (lesions)</b>                                                           | <input type="checkbox"/> YES <input type="checkbox"/> NO                                                                    |                                         |                                                   |               |              |              |
| <b>Lesion characteristics</b>                                                        | Distribution of lesions                                                                                                     | <b>Site</b>                             | <b>Number of each type of lesion at each site</b> |               |              |              |
|                                                                                      |                                                                                                                             |                                         | <b>New lesion</b>                                 | <b>Crusts</b> | <b>Scars</b> | <b>Other</b> |
|                                                                                      |                                                                                                                             | <input type="checkbox"/> Palms of hands |                                                   |               |              |              |
|                                                                                      |                                                                                                                             | <input type="checkbox"/> Soles of feet  |                                                   |               |              |              |
|                                                                                      |                                                                                                                             | <input type="checkbox"/> Face           |                                                   |               |              |              |
|                                                                                      |                                                                                                                             | <input type="checkbox"/> Back           |                                                   |               |              |              |
|                                                                                      |                                                                                                                             | <input type="checkbox"/> Thighs         |                                                   |               |              |              |
|                                                                                      |                                                                                                                             | <input type="checkbox"/> Legs           |                                                   |               |              |              |
|                                                                                      |                                                                                                                             | <input type="checkbox"/> Arms           |                                                   |               |              |              |
|                                                                                      |                                                                                                                             | <input type="checkbox"/> Forearms       |                                                   |               |              |              |
|                                                                                      |                                                                                                                             | <input type="checkbox"/> Abdomen        |                                                   |               |              |              |
|                                                                                      |                                                                                                                             | <input type="checkbox"/> Chest          |                                                   |               |              |              |
|                                                                                      |                                                                                                                             | <input type="checkbox"/> Genitals       |                                                   |               |              |              |
|                                                                                      |                                                                                                                             | <input type="checkbox"/> Mouth          |                                                   |               |              |              |
| <input type="checkbox"/> Nose                                                        |                                                                                                                             |                                         |                                                   |               |              |              |
| <input type="checkbox"/> Other, Specify : _____                                      |                                                                                                                             |                                         |                                                   |               |              |              |
| <b>Pain at lesion site</b>                                                           | <input type="checkbox"/> YES <input type="checkbox"/> NO<br>If yes, pain score : [ ] [ ]                                    |                                         |                                                   |               |              |              |
| <b>Please describe any other lesion complications :</b>                              | _____<br>_____<br>_____<br>_____                                                                                            |                                         |                                                   |               |              |              |
| <b>Keratitis</b>                                                                     | <input type="checkbox"/> YES <input type="checkbox"/> NO <input type="checkbox"/> Not known                                 |                                         |                                                   |               |              |              |
| <b>Cough</b>                                                                         | <input type="checkbox"/> YES <input type="checkbox"/> NO <input type="checkbox"/> Not known                                 |                                         |                                                   |               |              |              |
| <b>Clear sputum :</b>                                                                | <input type="checkbox"/> YES <input type="checkbox"/> NO <input type="checkbox"/> Not known                                 |                                         |                                                   |               |              |              |
| <b>Upper respiratory symptoms (sore throat, runny nose)</b>                          | <input type="checkbox"/> YES <input type="checkbox"/> NO <input type="checkbox"/> Not known<br>If yes, please specify _____ |                                         |                                                   |               |              |              |
| <b>Lower respiratory symptoms (productive cough, wheezing, respiratory distress)</b> | <input type="checkbox"/> YES <input type="checkbox"/> NO <input type="checkbox"/> Not known<br>If yes, please specify _____ |                                         |                                                   |               |              |              |
| <b>Breathlessness</b>                                                                | <input type="checkbox"/> YES <input type="checkbox"/> NO <input type="checkbox"/> Not known                                 |                                         |                                                   |               |              |              |

|                                |                                                                                                                                                                    |                                                                                                                                  |
|--------------------------------|--------------------------------------------------------------------------------------------------------------------------------------------------------------------|----------------------------------------------------------------------------------------------------------------------------------|
| <b>Lymphadenopathy</b>         | <input type="checkbox"/> YES <input type="checkbox"/> NO <input type="checkbox"/> Not known                                                                        |                                                                                                                                  |
| <b>Site of lymphadenopathy</b> | Axillary                                                                                                                                                           | <input type="checkbox"/> YES <input type="checkbox"/> NO Left <input type="checkbox"/> Right <input type="checkbox"/>            |
|                                | Cervical                                                                                                                                                           | <input type="checkbox"/> YES <input type="checkbox"/> NO Left <input type="checkbox"/> Right <input type="checkbox"/>            |
|                                | Inguinal                                                                                                                                                           | <input type="checkbox"/> YES <input type="checkbox"/> NO Left <input type="checkbox"/> Right <input type="checkbox"/>            |
|                                | Other                                                                                                                                                              | <input type="checkbox"/> YES <input type="checkbox"/> NO Site _____ Left <input type="checkbox"/> Right <input type="checkbox"/> |
| <b>Vomiting</b>                | <input type="checkbox"/> YES <input type="checkbox"/> NO <input type="checkbox"/> Not known                                                                        |                                                                                                                                  |
| <b>Diarrhoea</b>               | <input type="checkbox"/> YES <input type="checkbox"/> NO <input type="checkbox"/> Not known                                                                        |                                                                                                                                  |
| <b>Headache</b>                | <input type="checkbox"/> YES <input type="checkbox"/> NO <input type="checkbox"/> Not known                                                                        |                                                                                                                                  |
| <b>Muscle pain</b>             | <input type="checkbox"/> YES <input type="checkbox"/> NO <input type="checkbox"/> Not known                                                                        |                                                                                                                                  |
| <b>Joint pain</b>              | <input type="checkbox"/> YES <input type="checkbox"/> NO <input type="checkbox"/> Not known                                                                        |                                                                                                                                  |
| <b>Seizure</b>                 | <input type="checkbox"/> YES <input type="checkbox"/> NO <input type="checkbox"/> Not known                                                                        |                                                                                                                                  |
| <b>Level of consciousness</b>  | <input type="checkbox"/> Alert <input type="checkbox"/> Confused <input type="checkbox"/> Vocal <input type="checkbox"/> Pain <input type="checkbox"/> Unconscious |                                                                                                                                  |
| <b>Level of capacity</b>       | <b>Patient is able to feed himself/herself</b>                                                                                                                     | <input type="checkbox"/> YES <input type="checkbox"/> NO <input type="checkbox"/> Not known                                      |
|                                | <b>Patient is able to drink</b>                                                                                                                                    | <input type="checkbox"/> YES <input type="checkbox"/> NO <input type="checkbox"/> Not known                                      |
|                                | <b>Patient is able to walk</b>                                                                                                                                     | <input type="checkbox"/> YES <input type="checkbox"/> NO <input type="checkbox"/> Not known                                      |
| <b>Vital signs</b>             |                                                                                                                                                                    |                                                                                                                                  |
| <b>Respiratory rate</b>        | [ ][ ]/[ ]/min                                                                                                                                                     |                                                                                                                                  |
| <b>Pulse</b>                   | [ ][ ]/[ ]/min                                                                                                                                                     |                                                                                                                                  |
| <b>Blood pressure</b>          | Systolic [ ][ ]/[ ][ ]/mmHg Diastolic [ ][ ]/[ ][ ]/mmHg                                                                                                           |                                                                                                                                  |
| <b>Temperature</b>             | [ ][ ]/[ ][ ].[ ] C                                                                                                                                                |                                                                                                                                  |
| <b>Oxygen saturation</b>       | [ ][ ]/[ ][ ]% <input type="checkbox"/> Dans l'atmosphère <input type="checkbox"/> On oxygen treatment<br>[ ][ ]/[ ][ ]L/min                                       |                                                                                                                                  |

#### 6. TREATMENT FORM (TO BE COMPLETED ON EVERY DAY OF TREATMENT)

|                                           |                                                                                                |                                |
|-------------------------------------------|------------------------------------------------------------------------------------------------|--------------------------------|
| <b>DAILY TREATMENT</b>                    |                                                                                                |                                |
| Date of evaluation : [D][D]/[M][M]/[Y][Y] |                                                                                                |                                |
| <b>Morning dose of tecovirimat</b>        | <input type="checkbox"/> YES <input type="checkbox"/> NO<br><input type="checkbox"/> Not known | Dose ____mg Time [H][H]/[M][M] |
|                                           | If the dose was forgotten, modified or refused, please state the reason:<br>_____              |                                |
| <b>Evening dose of tecovirimat</b>        | <input type="checkbox"/> YES <input type="checkbox"/> NO<br><input type="checkbox"/> Not known | Dose ____mg Time [H][H]/[M][M] |
|                                           | If the dose was forgotten, modified or refused, please state the reason:<br>_____              |                                |
| <b>Paracetamol</b>                        | <input type="checkbox"/> YES <input type="checkbox"/> NO <input type="checkbox"/> Not known    |                                |
| <b>NSAID</b>                              | <input type="checkbox"/> YES <input type="checkbox"/> NO <input type="checkbox"/> Not known    |                                |
| <b>Intravenous solutions</b>              | <input type="checkbox"/> YES <input type="checkbox"/> NO <input type="checkbox"/> Not known    |                                |

**7. LABORATORY RESULTS (TO BE COMPLETED AT D4, D8, D14 AND D28)**

| RÉSULTATS DE LABORATOIRE |                                                           |                                                                                |
|--------------------------|-----------------------------------------------------------|--------------------------------------------------------------------------------|
| Prélèvement jour [_D_]   | <input type="checkbox"/> OUI <input type="checkbox"/> NON | PCR Result : <input type="checkbox"/> Positif <input type="checkbox"/> Négatif |

**8. EFFICACY EVALUATION (TO BE COMPLETED AT D15)**

|                                                                                                                                                                                                                                                                                                                                                                                                                                                                             |                    |                                                                                                                    |
|-----------------------------------------------------------------------------------------------------------------------------------------------------------------------------------------------------------------------------------------------------------------------------------------------------------------------------------------------------------------------------------------------------------------------------------------------------------------------------|--------------------|--------------------------------------------------------------------------------------------------------------------|
| <p><b>Date of evaluation</b> : [_D_][_D_]/[_M_][_M_]/[_Y_][_Y_]</p> <p><input type="checkbox"/> Recovery without sequelae</p> <p><input type="checkbox"/> Recovery with sequelae<br/>Sequelae : _____</p> <p><input type="checkbox"/> Death<br/>Date of death : [_D_][_D_]/[_M_][_M_]/[_Y_][_Y_]<br/>Cause of death : _____</p> <p><input type="checkbox"/> Early withdrawal</p> <p><input type="checkbox"/> Loss to follow-up<br/>Reason for loss to follow-up : _____</p> |                    |                                                                                                                    |
| <p><b>If the patient withdrew from the study</b></p> <p>Date :<br/>[_D_][_D_]/[_M_][_M_]/[_Y_][_Y_]</p>                                                                                                                                                                                                                                                                                                                                                                     | Adverse event      | <input type="checkbox"/> YES <input type="checkbox"/> NO Reason :<br>_____<br>(add further details on the AE form) |
|                                                                                                                                                                                                                                                                                                                                                                                                                                                                             | Patient decision   | <input type="checkbox"/> YES <input type="checkbox"/> NO Reason :<br>_____                                         |
|                                                                                                                                                                                                                                                                                                                                                                                                                                                                             | Clinician decision | <input type="checkbox"/> YES <input type="checkbox"/> NO Reason :<br>_____                                         |
|                                                                                                                                                                                                                                                                                                                                                                                                                                                                             | Other              | <input type="checkbox"/> YES <input type="checkbox"/> NO Reason :<br>_____                                         |
| <p><b>Did the patient complete treatment with tecovirimat for 14 days as per the protocol?</b> <input type="checkbox"/> YES <input type="checkbox"/> NO</p> <p><b>If YES, start date</b> : [_J_][_J_]/[_M_][_M_]/[_A_][_A_] <b>End date</b> : [_J_][_J_]/[_M_][_M_]/[_A_][_A_]</p> <p><b>If NO, start date</b> : [_J_][_J_]/[_M_][_M_]/[_A_][_A_] <b>End date</b> : [_J_][_J_]/[_M_][_M_]/[_A_][_A_]</p> <p><b>If NO, reason</b> : _____</p>                                |                    |                                                                                                                    |

**9. EFFICACY EVALUATION (TO BE COMPLETED AT D21 (IF APPLICABLE) AND D28)**

|                                                                                                                                                                                                                                                                                                                                                                                                                                                                             |  |  |
|-----------------------------------------------------------------------------------------------------------------------------------------------------------------------------------------------------------------------------------------------------------------------------------------------------------------------------------------------------------------------------------------------------------------------------------------------------------------------------|--|--|
| <p><b>Date of evaluation</b> : [_D_][_D_]/[_M_][_M_]/[_Y_][_Y_]</p> <p><input type="checkbox"/> Recovery without sequelae</p> <p><input type="checkbox"/> Recovery with sequelae<br/>Sequelae : _____</p> <p><input type="checkbox"/> Death<br/>Date of death : [_D_][_D_]/[_M_][_M_]/[_Y_][_Y_]<br/>Cause of death : _____</p> <p><input type="checkbox"/> Early withdrawal</p> <p><input type="checkbox"/> Loss to follow-up<br/>Reason for loss to follow-up : _____</p> |  |  |
|-----------------------------------------------------------------------------------------------------------------------------------------------------------------------------------------------------------------------------------------------------------------------------------------------------------------------------------------------------------------------------------------------------------------------------------------------------------------------------|--|--|

|                                                                                       |                    |                                                                                                                                    |
|---------------------------------------------------------------------------------------|--------------------|------------------------------------------------------------------------------------------------------------------------------------|
| <b>If the patient withdrew from the study</b><br>Date :<br>[D_][D_]/[M_][M_]/[Y_][Y_] | Adverse event      | <input type="checkbox"/> YES <input type="checkbox"/> NO Reason :<br>_____<br>(add further details on the SAE form, if applicable) |
|                                                                                       | Patient decision   | <input type="checkbox"/> YES <input type="checkbox"/> NO Reason :<br>_____                                                         |
|                                                                                       | Clinician decision | <input type="checkbox"/> YES <input type="checkbox"/> NO Reason :<br>_____                                                         |
|                                                                                       | Other              | <input type="checkbox"/> YES <input type="checkbox"/> NO Reason :<br>_____                                                         |

#### 10. PREGNANCY FOLLOW-UP

|                                                   |                                                                                                                                                                                                                                                                                                                                                                                                                                |
|---------------------------------------------------|--------------------------------------------------------------------------------------------------------------------------------------------------------------------------------------------------------------------------------------------------------------------------------------------------------------------------------------------------------------------------------------------------------------------------------|
| Has the mother consented to pregnancy follow-up ? | <input type="checkbox"/> YES <input type="checkbox"/> NO                                                                                                                                                                                                                                                                                                                                                                       |
| Date of pregnancy test :                          | [D_][D_]/[M_][M_]/[Y_][Y_]                                                                                                                                                                                                                                                                                                                                                                                                     |
| Date of last menstruation :                       | [D_][D_]/[M_][M_]/[Y_][Y_]                                                                                                                                                                                                                                                                                                                                                                                                     |
| Expected delivery date :                          | [D_][D_]/[M_][M_]/[Y_][Y_]                                                                                                                                                                                                                                                                                                                                                                                                     |
| Pregnancy outcome :                               | <input type="checkbox"/> Baby is in good health<br><input type="checkbox"/> Congenital malformations requiring admission to the neonatal unit<br><input type="checkbox"/> Abortion (by choice)<br><input type="checkbox"/> Abortion (for medical reasons)<br><input type="checkbox"/> Miscarriage<br><input type="checkbox"/> Stillbirth<br><input type="checkbox"/> Neonatal death<br><input type="checkbox"/> Maternal death |
| Date of outcome                                   | [D_][D_]/[M_][M_]/[Y_][Y_]                                                                                                                                                                                                                                                                                                                                                                                                     |

#### 11. DECLARATION OF APPROVAL BY THE INVESTIGATOR

|                                                                                                                                                                                                                                                                                  |
|----------------------------------------------------------------------------------------------------------------------------------------------------------------------------------------------------------------------------------------------------------------------------------|
| I have examined this CRF and confirm that, to the best of my knowledge, it accurately reflects the information obtained for this participant. All entries have been made either by me or by a person under my supervision who has been assigned according to the Delegation Log. |
| NAME : _____<br><br>Signature : _____<br><br>Date : [D_][D_]/[M_][M_]/[Y_][Y_]                                                                                                                                                                                                   |

**Table S3 - Patients' demographic information and characteristics at baseline, and post-baseline and outcomes**

|                                                                   | Baseline                                  | Post-baseline <sup>a</sup> |
|-------------------------------------------------------------------|-------------------------------------------|----------------------------|
| <b>Demographic characteristics</b>                                |                                           |                            |
| Male : female                                                     | 4 : 10                                    | --                         |
| Age (years): median (range)                                       | 23 (4 - 38)                               | --                         |
| <b>Comorbidities</b>                                              |                                           | --                         |
| Malaria: n/N (%) patients                                         | 11/13 (85%)                               | --                         |
| HIV: n/N (%) patients tested                                      | 1/3 (7%)                                  | --                         |
| <b>General characteristics</b>                                    |                                           |                            |
| Time (days) from symptom onset to treatment start: median (range) | 21 (5-45)                                 | --                         |
| <b>Signs and symptoms</b>                                         | <b>n/N (%) patients</b>                   | <b>n/N (%) patients</b>    |
| Fever (temperature >38.0 °C)                                      | 9/14 (64%)                                | 12/14 (86%)                |
| Lesions:                                                          | 14/14 (100%)                              | 14/14 (100%)               |
| New lesions:                                                      | 10/14 (71%)                               | 11/14 (79%)                |
| Number of lesions (total): median (range)                         | 302 (54-7586)                             | 351 (0-8170)               |
| Location of lesions:                                              |                                           |                            |
| Hands                                                             | 14/14 (100%)                              | 14/14 (100%)               |
| Feet                                                              | 14/14 (100%)                              | 14/14 (100%)               |
| Face                                                              | 14/14 (100%)                              | 14/14 (100%)               |
| Back                                                              | 14/14 (100%)                              | 14/14 (100%)               |
| Thighs                                                            | 14/14 (100%)                              | 14/14 (100%)               |
| Legs                                                              | 14/14 (100%)                              | 14/14 (100%)               |
| Arms                                                              | 14/14 (100%)                              | 14/14 (100%)               |
| Forearms                                                          | 14/14 (100%)                              | 14/14 (100%)               |
| Abdomen                                                           | 14/14 (100%)                              | 14/14 (100%)               |
| Chest                                                             | 14/14 (100%)                              | 14/14 (100%)               |
| Genitals                                                          | 11/14 (79%)                               | 12/14 (86%)                |
| Mouth                                                             | 10/14 (71%)                               | 10/14 (71%)                |
| Nose                                                              | 11/14 (79%)                               | 12/14 (86%)                |
| Other                                                             | 13/14 (93%)                               | 14/14 (100%)               |
| Lesion pain                                                       | 11/14 (79%)                               | 11/14 (79%)                |
| Lesion pain score: median (range)                                 | 7 (5-9)                                   | 5 (1-10)                   |
| Lymphadenopathy                                                   | 14/14 (100%)                              | 14/14 (100%)               |
| Keratitis                                                         | 2/14 (14%)                                | 2/14 (14%)                 |
| Cough                                                             | 5/14 (36%)                                | 6/14 (43%)                 |
| Clear sputum                                                      | 3/13 (23%)                                | 3/14 (21%)                 |
| Upper respiratory symptoms                                        | 11/14 (79%)                               | 11/14 (79%)                |
| Lower respiratory symptoms                                        | 4/14 (29%)                                | 5/14 (36%)                 |
| Breathlessness                                                    | 0/13 (0%)                                 | 1/14 (7%)                  |
| Vomiting                                                          | 0/14 (0%)                                 | 1/14 (7%)                  |
| Diarrhoea                                                         | 0/14 (0%)                                 | 0/14 (0%)                  |
| Headache                                                          | 14/14 (100%)                              | 14/14 (100%)               |
| Back pain                                                         | 11/14 (79%)                               | 13/14 (93%)                |
| Muscle pain                                                       | 14/14 (100%)                              | 14/14 (100%)               |
| Seizure                                                           | 0/14 (0%)                                 | 1/14 (7%)                  |
| Patient is able to eat independently                              | 13/14 (93%)                               | 13/14 (93%)                |
| Patient is able to drink independently                            | 14/14 (100%)                              | 13/14 (93%)                |
| Patient is able to walk independently                             | 13/14 (93%)                               | 13/14 (93%)                |
| <b>Outcome</b>                                                    | <b>Post-baseline<br/>n/N (%) patients</b> |                            |
| Completed full course of treatment                                | 14/14 (100%)                              |                            |
| <b>Patient outcome</b>                                            |                                           |                            |

|                                                  |            |
|--------------------------------------------------|------------|
| PCR positive at day 4                            | 7/14 (50%) |
| Blood                                            | 6/7 (86%)  |
| Active lesion                                    | 2/7 (29%)  |
| Lesion crust                                     | 1/7 (14%)  |
| PCR positive at day 8                            | 1/10 (10%) |
| Blood                                            | 1/1 (100%) |
| Active lesion                                    | 0/1 (0%)   |
| Lesion crust                                     | 0/1 (0%)   |
| PCR positive at day 14                           | 1/8 (12%)  |
| Blood                                            | 1/1 (100%) |
| Active lesion                                    | 1/1 (100%) |
| Lesion crust                                     | 1/1 (100%) |
| PCR positive at day 21                           | 1/2 (50%)  |
| Blood                                            | 1/1 (100%) |
| Active lesion                                    | 0/1 (0%)   |
| Lesion crust                                     | 1/1 (100%) |
| PCR positive at final visit                      | 1/13 (8%)  |
| Blood                                            | 1/1 (100%) |
| Active lesion                                    | 1/1 (100%) |
| Lesion crust                                     | 0/1 (0%)   |
| Time (days) to no new lesions: median (range)    | 5 (0-28)   |
| Recovered without sequelae at D28                | 4/13 (31%) |
| Recovered with sequelae at D28                   | 9/13 (69%) |
| Death                                            | 1/14 (7%)  |
| <b>Serious Adverse Events</b>                    |            |
| Patients with at least one serious adverse event | 2/14 (14%) |
| <i>Severity:</i>                                 |            |
| Mild                                             | 0          |
| Moderate                                         | 0          |
| Severe                                           | 0          |
| Life-threatening                                 | 1/2 (50%)  |
| Fatal                                            | 1/2 (50%)  |
| <i>System:</i>                                   |            |
| Blood and lymphatic system                       | 1/2 (50%)  |
| Other                                            | 1/2 (50%)  |

<sup>a</sup> Post-baseline includes any timepoint following baseline, including days on which patients are receiving treatment

**Figure S4 – Number of days to no active lesions and average number of active lesions per day**

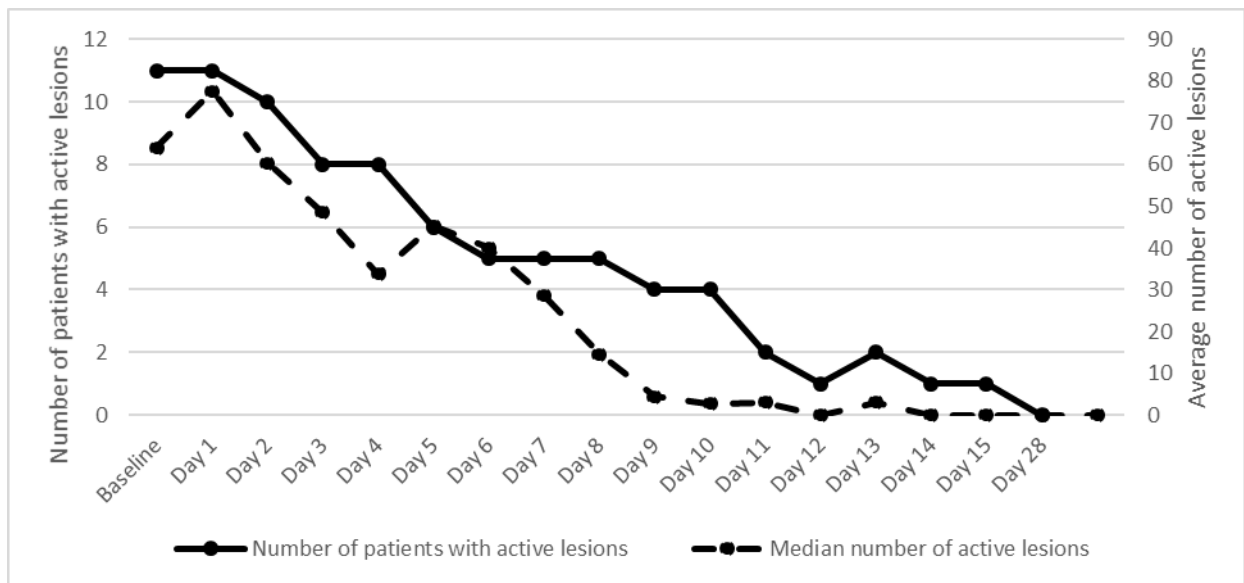

**Table S5 - Confirmed cases and case fatality ratio in CAR between 2010 and September 2022 – overall case fatality 10.4%**

| <b>Year</b> | <b>Month</b> | <b>Confirmed cases</b> | <b>Deaths</b> |
|-------------|--------------|------------------------|---------------|
| 2010        | June         | 1                      | 0             |
| 2012        | April        | 2                      | 0             |
| 2015        | December     | 1                      | 1             |
| 2015        | December     | 3                      | 3             |
| 2016        | January      | 1                      | 0             |
| 2016        | August       | 3                      | 2             |
| 2017        | January      | 5                      | 0             |
| 2017        | April        | 1                      | 0             |
| 2018        | February     | 9                      | 0             |
| 2018        | June         | 3                      | 0             |
| 2018        | August       | 1                      | 0             |
| 2018        | September    | 1                      | 0             |
| 2018        | September    | 1                      | 0             |
| 2018        | September    | 6                      | 0             |
| 2018        | October      | 1                      | 0             |
| 2018        | October      | 1                      | 0             |
| 2018        | November     | 3                      | 0             |
| 2018        | December     | 3                      | 1             |
| 2019        | January      | 1                      | 0             |
| 2019        | February     | 1                      | 0             |
| 2019        | August       | 1                      | 0             |
| 2019        | August       | 4                      | 1             |
| 2019        | September    | 1                      | 1             |
| 2019        | September    | 2                      | 0             |
| 2019        | September    | 1                      | 0             |
| 2019        | September    | 1                      | 0             |
| 2019        | October      | 3                      | 0             |
| 2020        | November     | 2                      | 0             |
| 2020        | November     | 2                      | 0             |
| 2020        | November     | 1                      | 0             |
| 2020        | December     | 3                      | 0             |
| 2021        | February     | 1                      | 0             |
| 2021        | August       | 3                      | 0             |
| 2021        | September    | 4                      | 0             |
| 2021        | September    | 2                      | 1             |
| 2021        | September    | 1                      | 0             |
| 2021        | October      | 2                      | 0             |
| 2021        | November     | 13                     | 1             |
| 2021        | November     | 1                      | 0             |
| 2021        | December     | 1                      | 0             |



|       |           |     |    |
|-------|-----------|-----|----|
| 2022  | January   | 1   | 0  |
| 2022  | February  | 1   | 0  |
| 2022  | February  | 1   | 0  |
| 2022  | March     | 1   | 0  |
| 2022  | July      | 1   | 0  |
| 2022  | July      | 1   | 0  |
| 2022  | August    | 1   | 0  |
| 2022  | August    | 1   | 0  |
| 2022  | September | 1   | 0  |
| Total |           | 106 | 11 |
